# Supplementary material
Source: PubMed Central journal article supplement (PMC3375948)
Supplement: NIHMS366806-supplement-Supp_Data.pdf [file NIHMS366806-supplement-Supp_Data.pdf]

Glassberg et al.  
**Data Supplement**

**The 2010 Poverty Guidelines for the 48 Contiguous States and the District of Columbia**

*The HHS provides a sliding-scale poverty cutoff based on the number of people per household. For the SIT Trial, participants indicated their income in \$10,000 increments. This data was then recoded into a dichotomous variable based on the cutoffs below.*

| <b>Persons in family</b> | <b>Poverty guideline</b> |
|--------------------------|--------------------------|
| 1                        | \$10,830                 |
| 2                        | 14,570                   |
| 3                        | 18,310                   |
| 4                        | 22,050                   |
| 5                        | 25,790                   |
| 6                        | 29,530                   |
| 7                        | 33,270                   |
| 8                        | 37,010                   |

For families with more than 8 persons, add \$3,740 for each additional person.

Available online < <http://aspe.hhs.gov/poverty/10poverty.shtml> >
